# Supplementary material for: New drug–drug and drug–nutraceutical salts of anti-emetic drug domperidone: structural and physicochemical aspects of new salts
Source: Royal Society of Chemistry journal article supplement (doi:10.1039/d3ce01000g), 2024-01-01
Supplement: d3ce01000g1.pdf [file d3ce01000g1.pdf]

## New Drug-Drug and Drug-Nutraceutical Salts of Anti-emetic Drug Domperidone: Structural and Physicochemical Aspects of New Salts

Sunil Kumar Nechipadappu<sup>a,c\*</sup> and Debasish Swain<sup>b,c\*</sup>

<sup>a</sup> Centre for X-ray Crystallography, Department of Analytical & Structural Chemistry, CSIR-Indian Institute of Chemical Technology, Hyderabad, 500007, India

<sup>b</sup> Department of Analytical & Structural Chemistry, CSIR-Indian Institute of Chemical Technology, Hyderabad, 500007, India

<sup>c</sup> Academy of Scientific and Innovative Research (AcSIR), Ghaziabad, 201002, India

\*Corresponding author: nsunilkumar@iict.res.in, debasish@iict.res.in

### Table of Contents

| S. No | Figure/Table caption                                                                        | Figure/Table No. | Page No. |
|-------|---------------------------------------------------------------------------------------------|------------------|----------|
| 1.    | The geometries of hydrogen bond interaction in DOM salts.                                   | Table S1         | S3-S4    |
| 2.    | The percentage weight loss comparison in DOM salts                                          | Table S2         | S4       |
| 3.    | Standard Linearity curve of DOM.                                                            | Figure S1        | S5       |
| 4.    | PXRD overlay of DOM-NCA I, DOM-SLA, and DOM-MAA I salt shows the PXRD patterns' similarity. | Figure S2        | S5       |
| 5.    | 3D Packing of DOM-NCA I (Green color: DOM, Blue color: NCA)                                 | Figure S3        | S6       |
| 6.    | 3D Packing of DOM-SLA (Green color: DOM, Blue color: SLA).                                  | Figure S4        | S6       |
| 7.    | 3D Packing of DOM-MAA I (Green color: DOM, Blue color: MAA).                                | Figure S5        | S7       |
| 8.    | FT-IR spectrum overlay of DOM-NCA II with DOM and NCA                                       | Figure S6        | S7       |
| 9.    | FT-IR spectrum overlay of DOM-MAA and DOM-MAA II with DOM and MAA                           | Figure S7        | S8       |
| 10.   | FT-IR spectrum overlay of DOM-SLA with DOM and SLA                                          | Figure S8        | S8       |
| 11.   | FT-IR spectrum overlay of DOM-OTA with DOM and OTA                                          | Figure S9        | S9       |
| 12.   | FT-IR spectrum overlay of DOM-ASP with DOM and ASP                                          | Figure S10       | S9       |
| 13.   | PXRD comparison of DOM-MAA II after heating experiments                                     | Figure S11       | S10      |
| 14.   | DSC heat-cool experiment data                                                               | Figure S12       | S11      |
| 15.   | Comparison of PXRD of simulated and experimental patterns.                                  | Figure S13       | S12      |
| 16.   | PXRD overlay of DOM after equilibrium solubility study.                                     | Figure S14       | S13      |
| 17.   | PXRD overlay of DOM-NCA II salt after equilibrium solubility study.                         | Figure S15       | S13      |
| 17.   | PXRD overlay of DOM-MAA II salt after equilibrium solubility study.                         | Figure S16       | S14      |

|     |                                                                  |            |     |
|-----|------------------------------------------------------------------|------------|-----|
| 18. | PXRD overlay of DOM-MAA salt after equilibrium solubility study. | Figure S17 | S14 |
| 19. | PXRD overlay of DOM-SLA salt after equilibrium solubility study. | Figure S18 | S15 |
| 20. | PXRD overlay of DOM-OTA salt after equilibrium solubility study. | Figure S19 | S15 |
| 21. | PXRD overlay of DOM-ASP salt after equilibrium solubility study. | Figure S20 | S16 |

**Table S1:** The geometries of hydrogen bond interaction in DOM salts.

| <b>DOM-NCA-I</b>                                                                                                                                         |          |           |            |            |
|----------------------------------------------------------------------------------------------------------------------------------------------------------|----------|-----------|------------|------------|
| D—H···A                                                                                                                                                  | D—H      | H···A     | D···A      | D—H···A    |
| N1—H1N···O1W <sup>i</sup>                                                                                                                                | 0.85 (3) | 1.98 (3)  | 2.825 (3)  | 173 (2)    |
| N3—H3N···O3                                                                                                                                              | 0.94 (3) | 1.92 (3)  | 2.831 (4)  | 165 (2)    |
| N3—H3N···O4                                                                                                                                              | 0.94 (3) | 2.47 (3)  | 3.172 (6)  | 132.2 (19) |
| N5—H5N···O2 <sup>ii</sup>                                                                                                                                | 0.92 (4) | 1.87 (4)  | 2.790 (3)  | 172 (3)    |
| O1W—H1W···O2W                                                                                                                                            | 0.88 (1) | 1.86 (2)  | 2.686 (4)  | 156 (5)    |
| O2W—H3W···O2 <sup>iii</sup>                                                                                                                              | 0.86 (1) | 1.92 (1)  | 2.772 (4)  | 172 (6)    |
| O2W—H4W···O4                                                                                                                                             | 0.86 (1) | 1.73 (3)  | 2.532 (7)  | 156 (7)    |
| Symmetry codes: (i) $-x+2, -y+1, -z+1$ ; (ii) $-x+4, -y+1, -z+2$ ; (iii) $x-1, y, z$ .                                                                   |          |           |            |            |
| <b>DOM-NCA-II</b>                                                                                                                                        |          |           |            |            |
| N1—H1N···N6 <sup>i</sup>                                                                                                                                 | 0.86     | 1.98      | 2.830 (3)  | 170        |
| N3—H3N···O3                                                                                                                                              | 0.98 (3) | 1.76 (3)  | 2.735 (5)  | 172 (2)    |
| N5—H5N···O1W <sup>ii</sup>                                                                                                                               | 0.86     | 2.05      | 2.821 (3)  | 149        |
| O1W—H2W···O4 <sup>iii</sup>                                                                                                                              | 0.86 (1) | 2.46 (5)  | 3.085 (5)  | 131 (6)    |
| O1W—H1W···O2                                                                                                                                             | 0.86 (1) | 1.96 (1)  | 2.804 (3)  | 169 (5)    |
| O2W—H3W···O3W                                                                                                                                            | 0.87 (1) | 2.01 (4)  | 2.792 (8)  | 149 (7)    |
| O2W—H4W···O2                                                                                                                                             | 0.88 (1) | 2.10 (4)  | 2.851 (4)  | 144 (7)    |
| Symmetry codes: (i) $-x+1, y+1/2, -z+3/2$ ; (ii) $x, -y+3/2, z-1/2$ ; (iii) $-x, y+1/2, -z+1/2$ .                                                        |          |           |            |            |
| <b>DOM-MAA-I</b>                                                                                                                                         |          |           |            |            |
| O2W—H4W···O5 <sup>i</sup>                                                                                                                                | 0.86 (1) | 2.06 (2)  | 2.902 (4)  | 166 (5)    |
| N1—H1N···O2W <sup>ii</sup>                                                                                                                               | 0.86 (2) | 2.02 (2)  | 2.857 (3)  | 165 (3)    |
| N3—H3N···O3                                                                                                                                              | 0.86 (3) | 2.63 (2)  | 3.226 (3)  | 127 (2)    |
| N3—H3N···O4                                                                                                                                              | 0.86 (3) | 1.90 (3)  | 2.754 (2)  | 173 (3)    |
| N5—H5N···O2 <sup>iii</sup>                                                                                                                               | 0.92 (2) | 1.88 (2)  | 2.799 (2)  | 171 (4)    |
| O5—H5O···O4                                                                                                                                              | 0.87 (1) | 1.98 (9)  | 2.589 (3)  | 127 (9)    |
| O5—H5O···O3W                                                                                                                                             | 0.87 (1) | 2.45 (10) | 2.928 (17) | 116 (8)    |
| O1W—H1W···O3                                                                                                                                             | 0.86 (1) | 1.92 (2)  | 2.749 (4)  | 164 (6)    |
| O1W—H2W···O2 <sup>iv</sup>                                                                                                                               | 0.85 (1) | 2.01 (2)  | 2.846 (3)  | 167 (6)    |
| O2W—H3W···O1W                                                                                                                                            | 0.86 (1) | 1.93 (2)  | 2.763 (4)  | 163 (6)    |
| Symmetry codes: (i) $x, y-1, z$ ; (ii) $-x+1, -y+1, -z+1$ ; (iii) $-x, -y+1, -z$ ; (iv) $x+1, y, z$ .                                                    |          |           |            |            |
| <b>DOM-MAA-II</b>                                                                                                                                        |          |           |            |            |
| N1—H1N···O1W <sup>i</sup>                                                                                                                                | 0.91 (2) | 1.92 (2)  | 2.830 (3)  | 171 (2)    |
| N5—H5N···O1 <sup>ii</sup>                                                                                                                                | 0.90 (3) | 2.07 (3)  | 2.961 (3)  | 174 (3)    |
| O3—H3A···O2 <sup>iii</sup>                                                                                                                               | 0.82     | 1.86      | 2.604 (4)  | 151        |
| O1W—H2W···O1 <sup>iv</sup>                                                                                                                               | 0.86 (1) | 2.06 (2)  | 2.902 (3)  | 165 (7)    |
| O2W—H3W···O4 <sup>v</sup>                                                                                                                                | 0.87 (1) | 1.96 (1)  | 2.826 (3)  | 173 (4)    |
| N3—H3N···O4                                                                                                                                              | 0.84 (3) | 2.41 (3)  | 3.069 (3)  | 136 (2)    |
| N3—H3N···O5                                                                                                                                              | 0.84 (3) | 2.00 (3)  | 2.820 (3)  | 164 (2)    |
| O1W—H1W···O2W                                                                                                                                            | 0.86 (1) | 1.96 (1)  | 2.817 (3)  | 173 (4)    |
| O2W—H4W···O5                                                                                                                                             | 0.87 (1) | 2.09 (2)  | 2.936 (3)  | 162 (4)    |
| Symmetry codes: (i) $-x+1, -y+1, -z+1$ ; (ii) $-x+3/2, y-1/2, -z+1/2$ ; (iii) $-x+1/2, y+1/2, -z+1/2$ ; (iv) $x-1, y, z$ ; (v) $-x+1/2, y-1/2, -z+1/2$ . |          |           |            |            |
| <b>DOM-MAA</b>                                                                                                                                           |          |           |            |            |
| N1—H1···O1 <sup>i</sup>                                                                                                                                  | 0.88     | 1.98      | 2.823 (3)  | 160        |
| N5—H5A···O2 <sup>ii</sup>                                                                                                                                | 0.88     | 1.95      | 2.775 (4)  | 155        |
| O5—H5O···O4 <sup>iii</sup>                                                                                                                               | 0.84     | 2.28      | 2.927 (5)  | 134        |

|                                                                                                           |          |            |             |            |
|-----------------------------------------------------------------------------------------------------------|----------|------------|-------------|------------|
| N3—H3N···O3                                                                                               | 0.91 (2) | 1.71 (2)   | 2.618 (4)   | 179 (4)    |
| N3—H3N···O4                                                                                               | 0.91 (2) | 2.55 (3)   | 3.126 (4)   | 122 (3)    |
| O5—H5O···O4                                                                                               | 0.84     | 2.18       | 2.665 (4)   | 116        |
| Symmetry codes: (i) $-x, -y, -z+1$ ; (ii) $-x+1, -y+2, -z+2$ ; (iii) $-x+2, -y+1, -z+2$ .                 |          |            |             |            |
| <b>DOM-SLA</b>                                                                                            |          |            |             |            |
| N1—H1N···O2W <sup>i</sup>                                                                                 | 0.87 (2) | 1.97 (2)   | 2.828 (2)   | 168 (2)    |
| N5—H5N···O2 <sup>ii</sup>                                                                                 | 0.82 (2) | 1.99 (3)   | 2.794 (2)   | 165 (3)    |
| O1W—H2W···O3 <sup>iii</sup>                                                                               | 0.88 (2) | 1.99 (2)   | 2.826 (3)   | 158 (4)    |
| O2W—H4W···O5 <sup>iv</sup>                                                                                | 0.87 (2) | 2.10 (3)   | 2.925 (4)   | 157 (5)    |
| O5—H5O···O4                                                                                               | 0.90 (2) | 1.95 (5)   | 2.511 (4)   | 118 (4)    |
| N3—H3N···O3                                                                                               | 0.95 (2) | 1.83 (2)   | 2.719 (2)   | 155.7 (18) |
| O1W—H1W···O2                                                                                              | 0.86 (2) | 1.94 (2)   | 2.791 (3)   | 166 (4)    |
| O2W—H3W···O1W                                                                                             | 0.89 (2) | 1.86 (2)   | 2.734 (3)   | 167 (5)    |
| O3W—H6W···O4                                                                                              | 0.87 (2) | 2.16 (3)   | 3.004 (6)   | 163 (7)    |
| Symmetry codes: (i) $-x, -y+1, -z+1$ ; (ii) $-x, -y+2, -z+2$ ; (iii) $x-1, y, z$ ; (iv) $x-1, y+1, z$ .   |          |            |             |            |
| <b>DOM-OTA</b>                                                                                            |          |            |             |            |
| N1—H1N···O5 <sup>i</sup>                                                                                  | 0.82 (3) | 2.03 (3)   | 2.821 (4)   | 162 (3)    |
| N5—H5N···O6 <sup>ii</sup>                                                                                 | 0.90 (4) | 1.94 (4)   | 2.832 (3)   | 175 (4)    |
| N6—H6N···O4 <sup>iii</sup>                                                                                | 0.90 (3) | 1.97 (3)   | 2.843 (3)   | 166 (3)    |
| N7—H7N···O2 <sup>iv</sup>                                                                                 | 0.77 (2) | 2.05 (3)   | 2.811 (3)   | 177 (3)    |
| N3—H3N···O3                                                                                               | 0.94 (3) | 1.72 (3)   | 2.658 (3)   | 174 (2)    |
| Symmetry codes: (i) $-x, -y+1, -z$ ; (ii) $x+1, y-1, z$ ; (iii) $-x+1, -y+1, -z+1$ ; (iv) $x-1, y+1, z$ . |          |            |             |            |
| <b>DOM-ASP</b>                                                                                            |          |            |             |            |
| N5—H5N···O4 <sup>i</sup>                                                                                  | 0.95 (3) | 1.92 (3)   | 2.798 (2)   | 153 (2)    |
| N5—H5N···O5 <sup>i</sup>                                                                                  | 0.95 (3) | 2.65 (3)   | 3.290 (2)   | 125.5 (18) |
| N1—H1N···O3 <sup>ii</sup>                                                                                 | 0.82 (2) | 2.17 (2)   | 2.9510 (19) | 159.9 (19) |
| N3—H3N···O3                                                                                               | 0.88 (2) | 1.81 (2)   | 2.6842 (19) | 171.7 (18) |
| N3—H3N···O4                                                                                               | 0.88 (2) | 2.646 (19) | 3.288 (2)   | 130.5 (15) |
| Symmetry codes: (i) $-x+1, y+1/2, -z+1/2$ ; (ii) $x, y-1, z$ .                                            |          |            |             |            |

**Table S2:** The percentage weight loss comparison in DOM salts with theoretical weight loss.

| Compound name | Theoretical weight loss for H <sub>2</sub> O molecules | Observed weight loss between 30-150 °C | Decomposition temperature (°C) |
|---------------|--------------------------------------------------------|----------------------------------------|--------------------------------|
| DOM           | --                                                     | 0.51%                                  | 250                            |
| DOM-NCA II    | 7.58%                                                  | 6.74%                                  | 160                            |
| DOM-MAA II    | 5.86%                                                  | 6.1%                                   | 200                            |
| DOM-MAA       | --                                                     | 0.50%                                  | 200                            |
| DOM-SLA       | 7.38%                                                  | 7.25%                                  | 200                            |
| DOM-OTA       | --                                                     | 0.58%                                  | 275                            |
| DOM-ASP       | --                                                     | 0.18%                                  | 190                            |

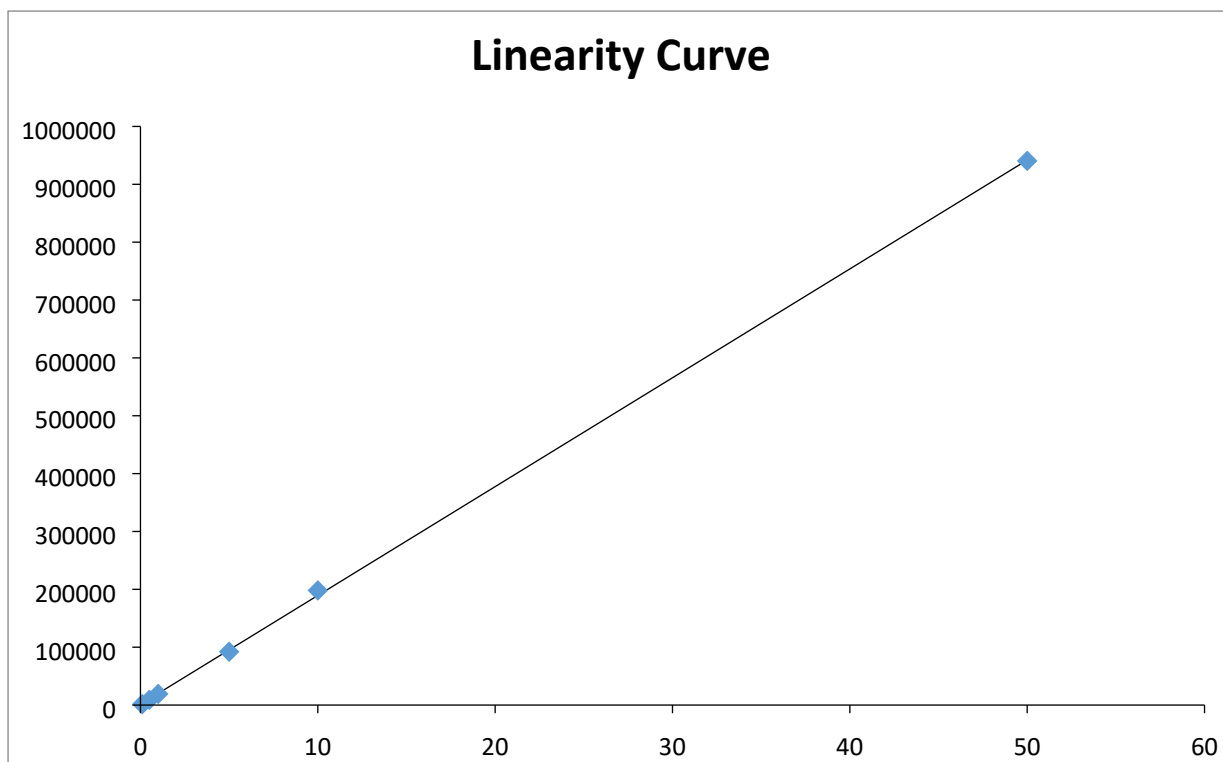

**Figure S1:** Standard Linearity curve of DOM.

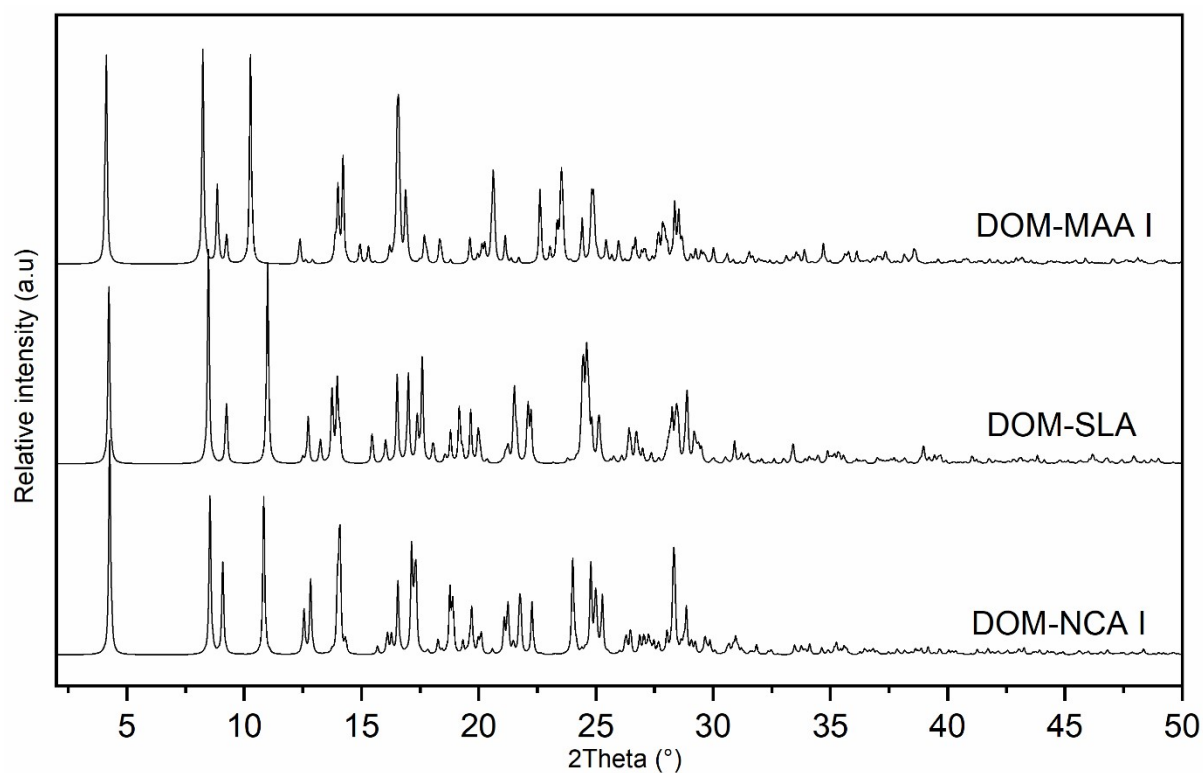

**Figure S2:** PXRD overlay of DOM-NCA I, DOM-SLA, and DOM-MAA I salt shows the PXRD patterns' similarity.

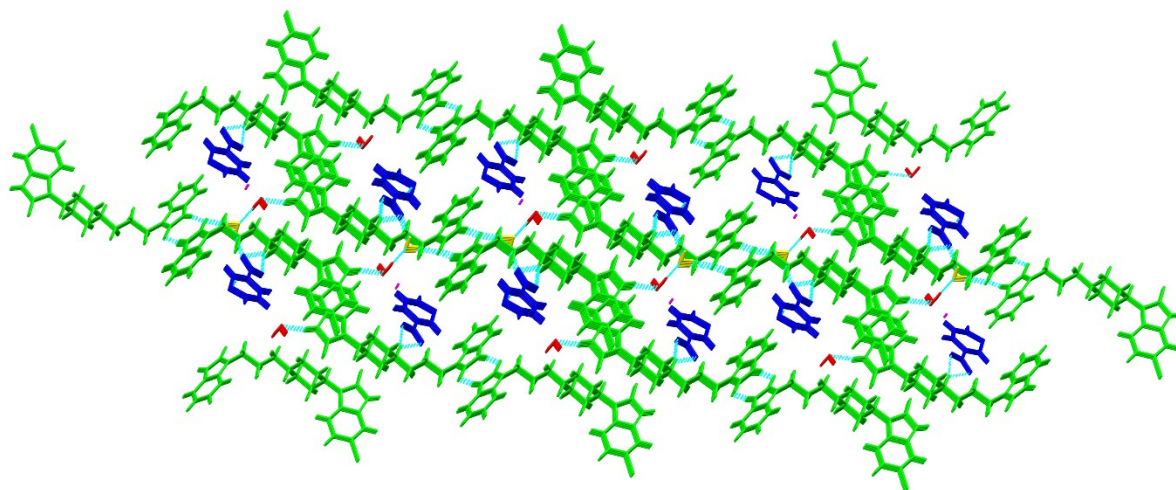

**Figure S3:** 3D Packing of DOM-NCA I (Green color: DOM, Blue color: NCA)

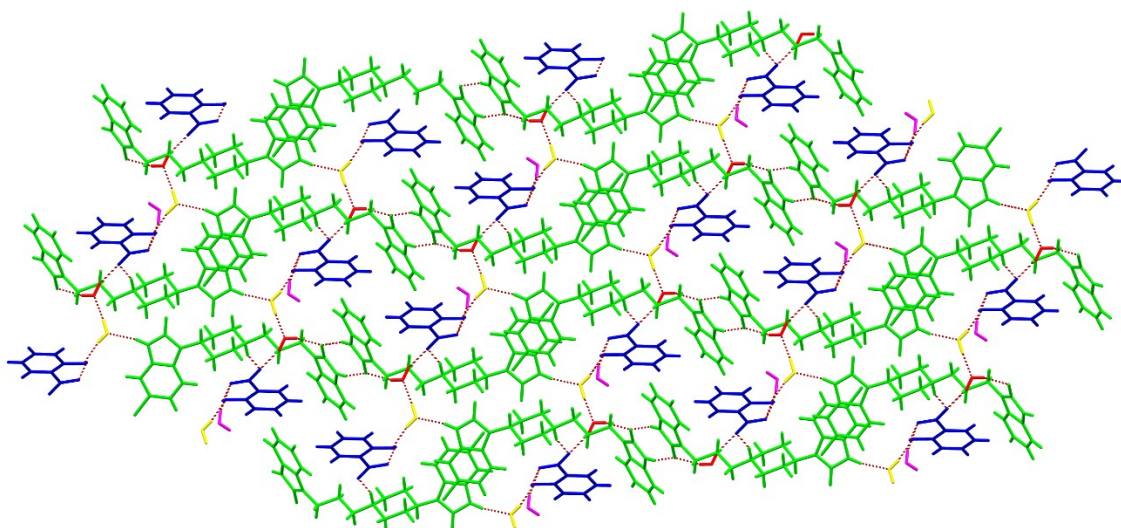

**Figure S4:** 3D Packing of DOM-SLA (Green color: DOM, Blue color: SLA).

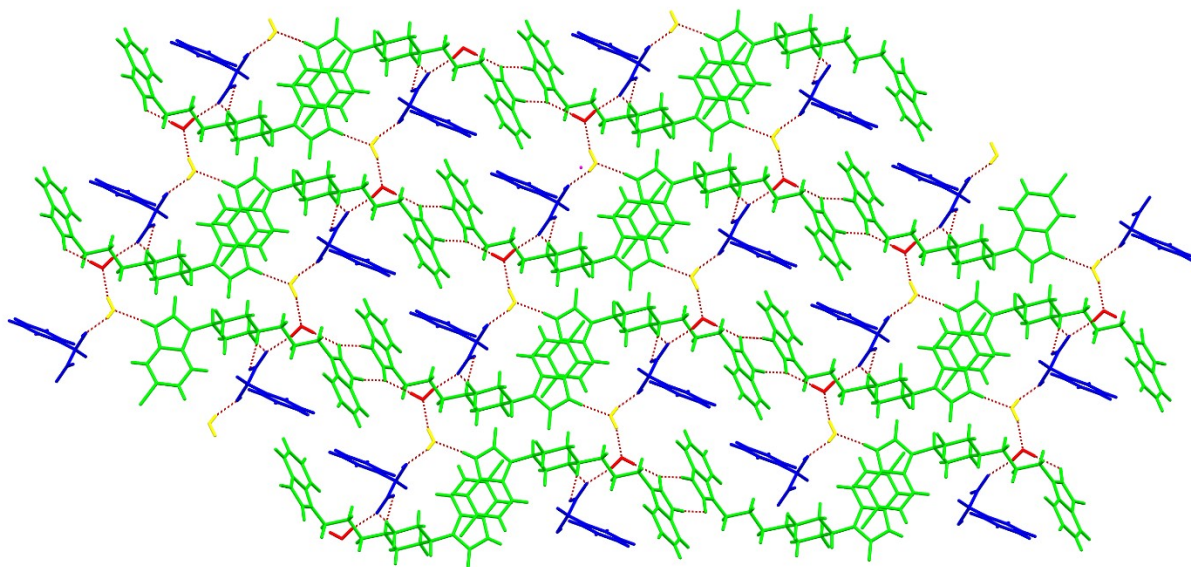

**Figure S5:** 3D Packing of DOM-MAA I (Green color: DOM, Blue color: MAA).

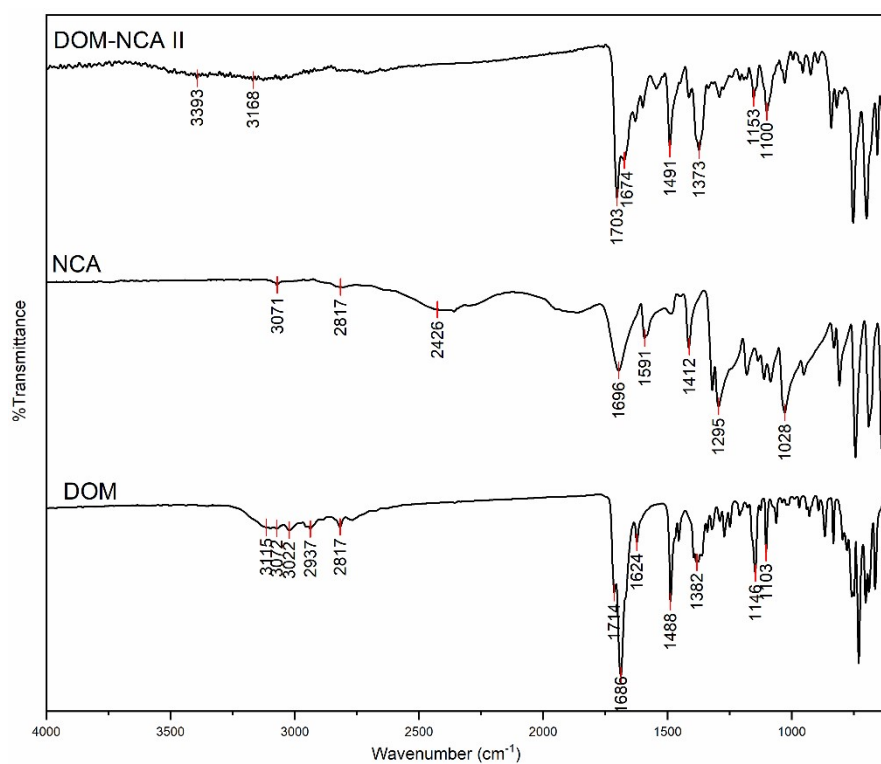

**Figure S6:** FT-IR comparison plot of DOM-NCA II with DOM and NCA.

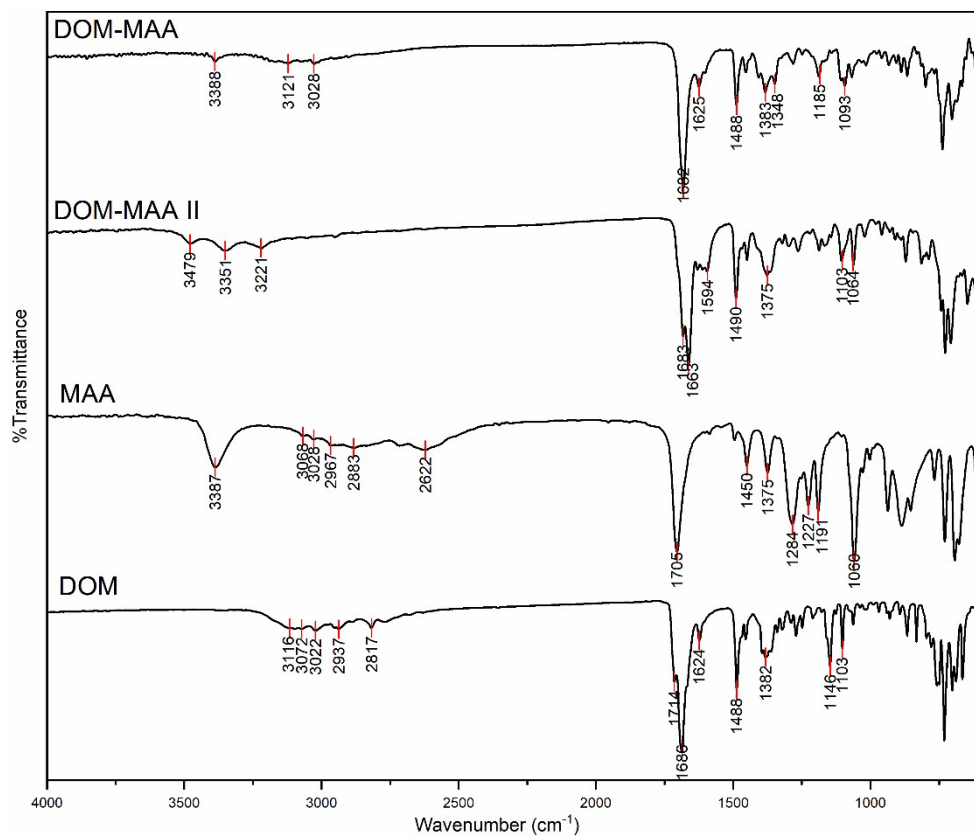

**Figure S7:** FT-IR comparison plot of DOM-MAA II and DOM-MAA with DOM and MAA.

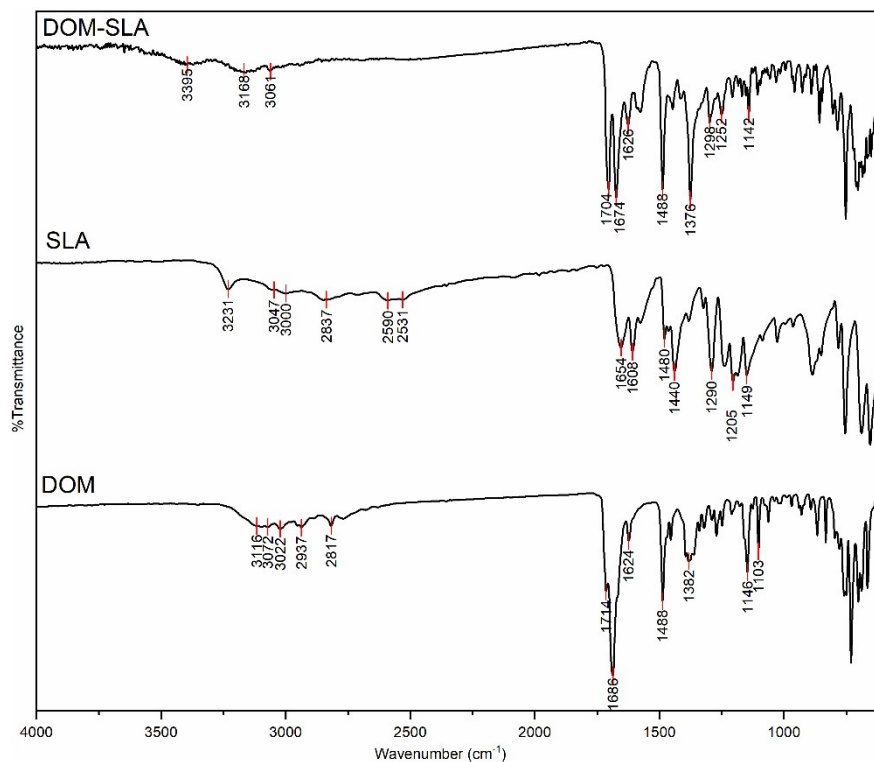

**Figure S8:** FT-IR comparison plot of DOM-SLA with DOM and SLA.



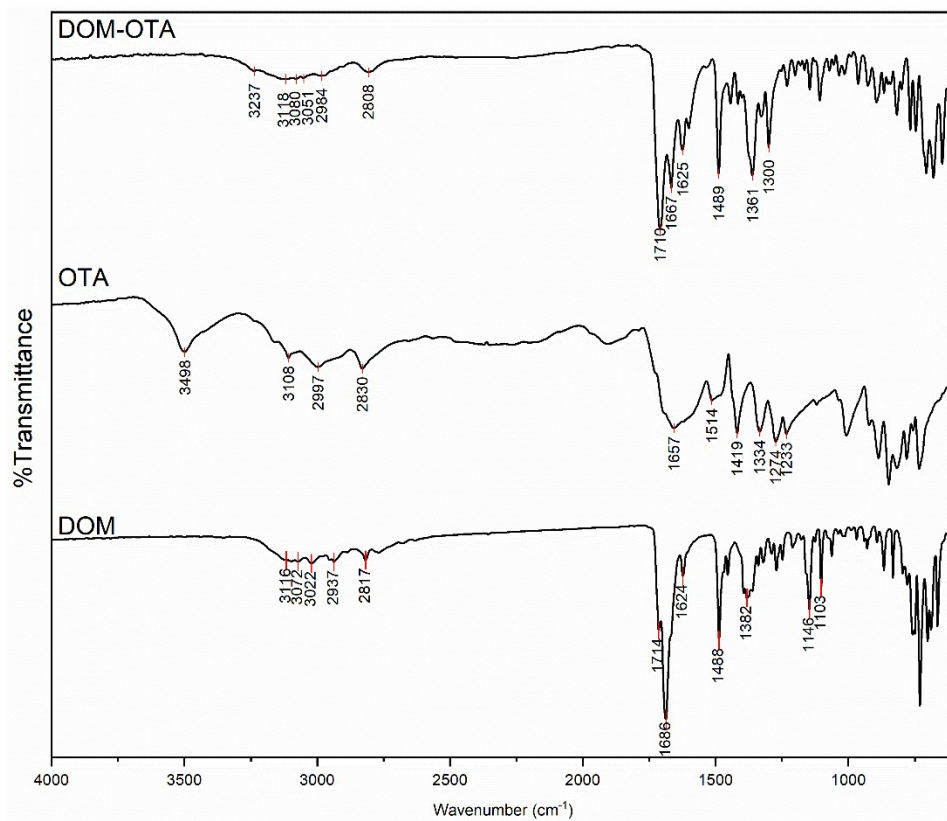

**Figure S9:** FT-IR comparison plot of DOM-OTA with DOM and OTA.

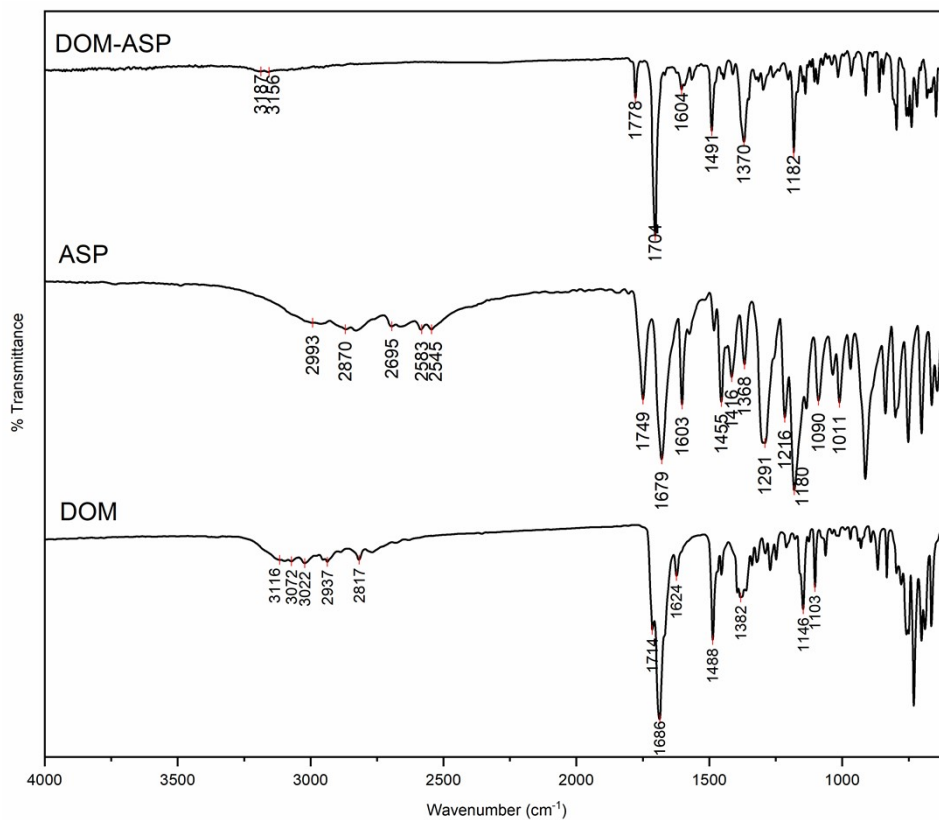

**Figure S10:** FT-IR comparison plot of DOM-ASP with DOM and ASP.

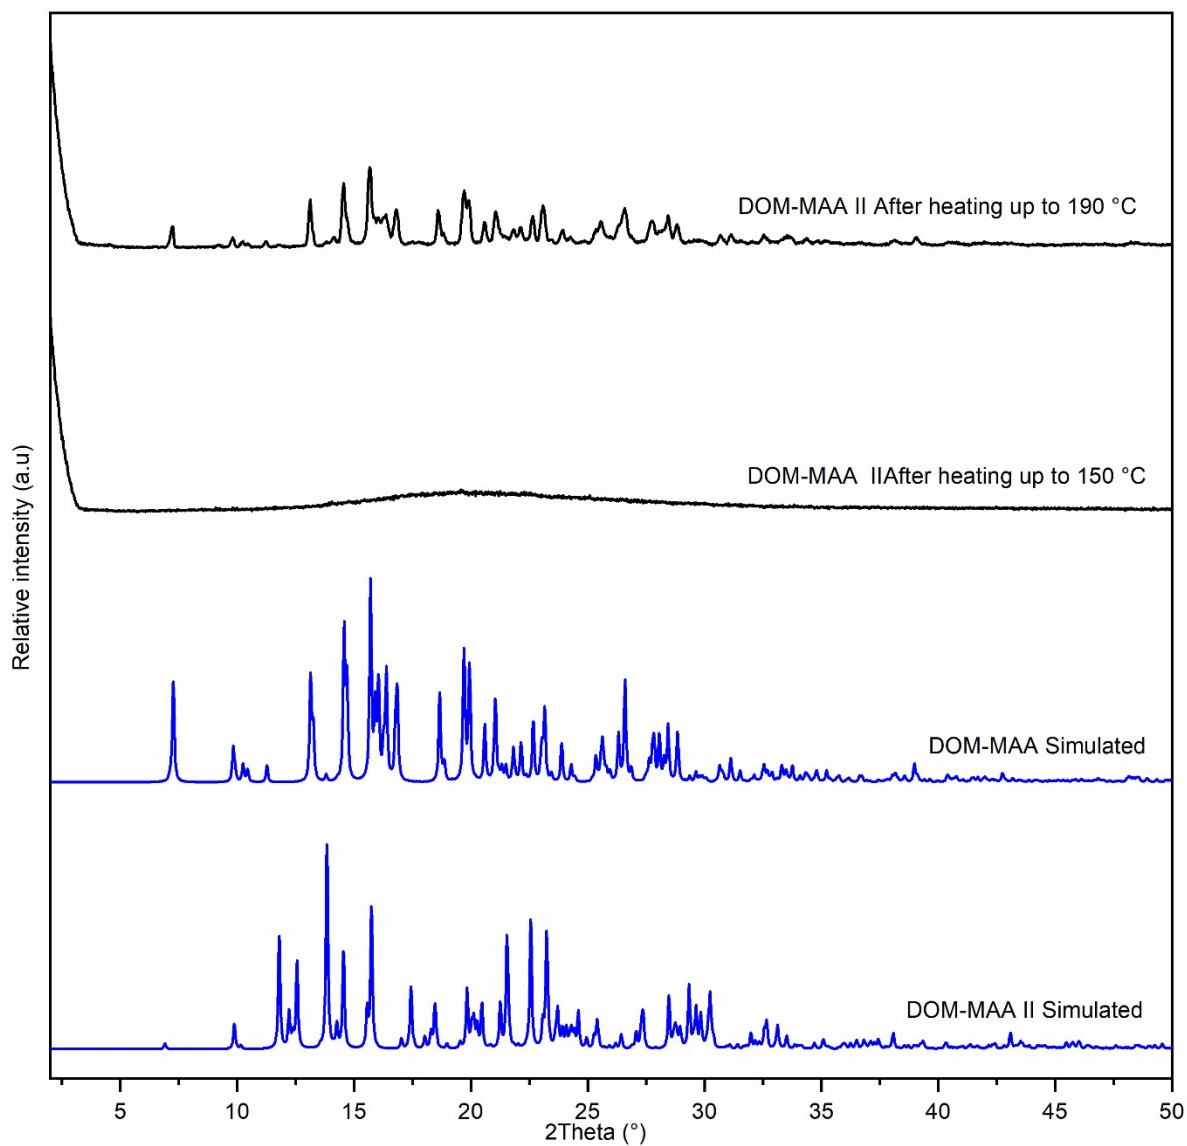

**Figure S11:** PXRd overlay of DOM-MAA II after heating with simulated patterns.

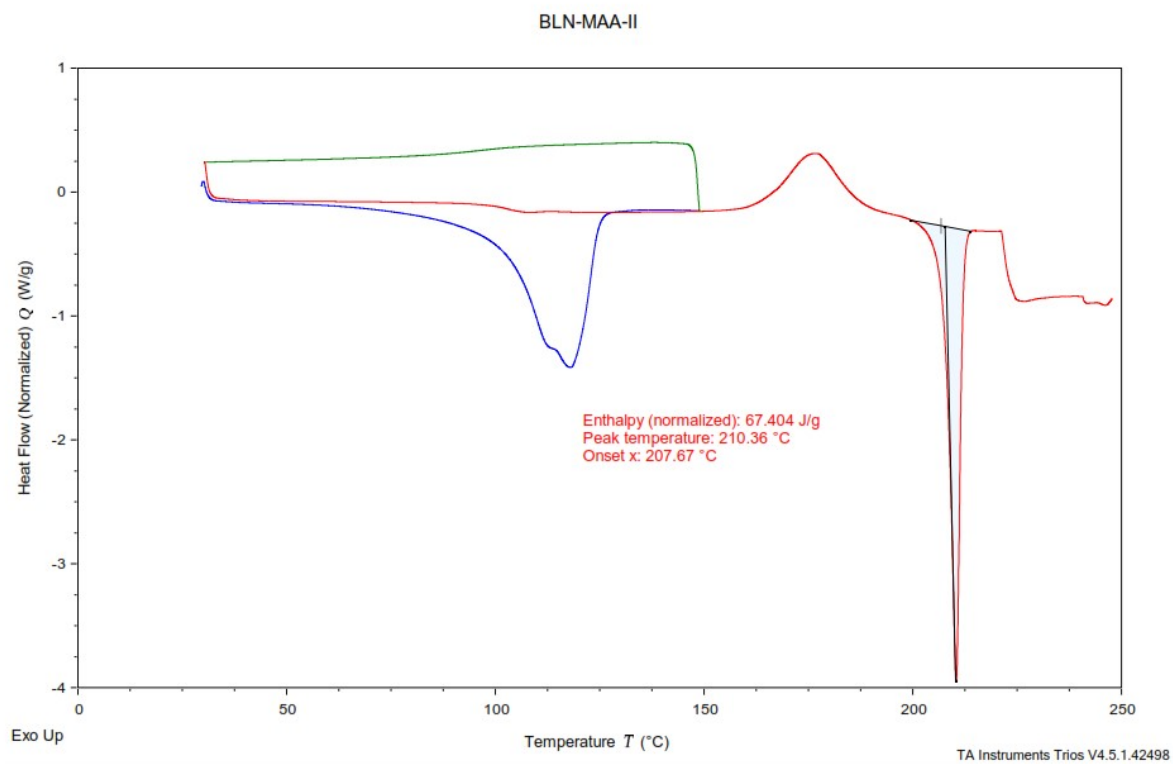

**Figure S12:** DSC thermogram of DOM-MAA II heat-cool experiment.

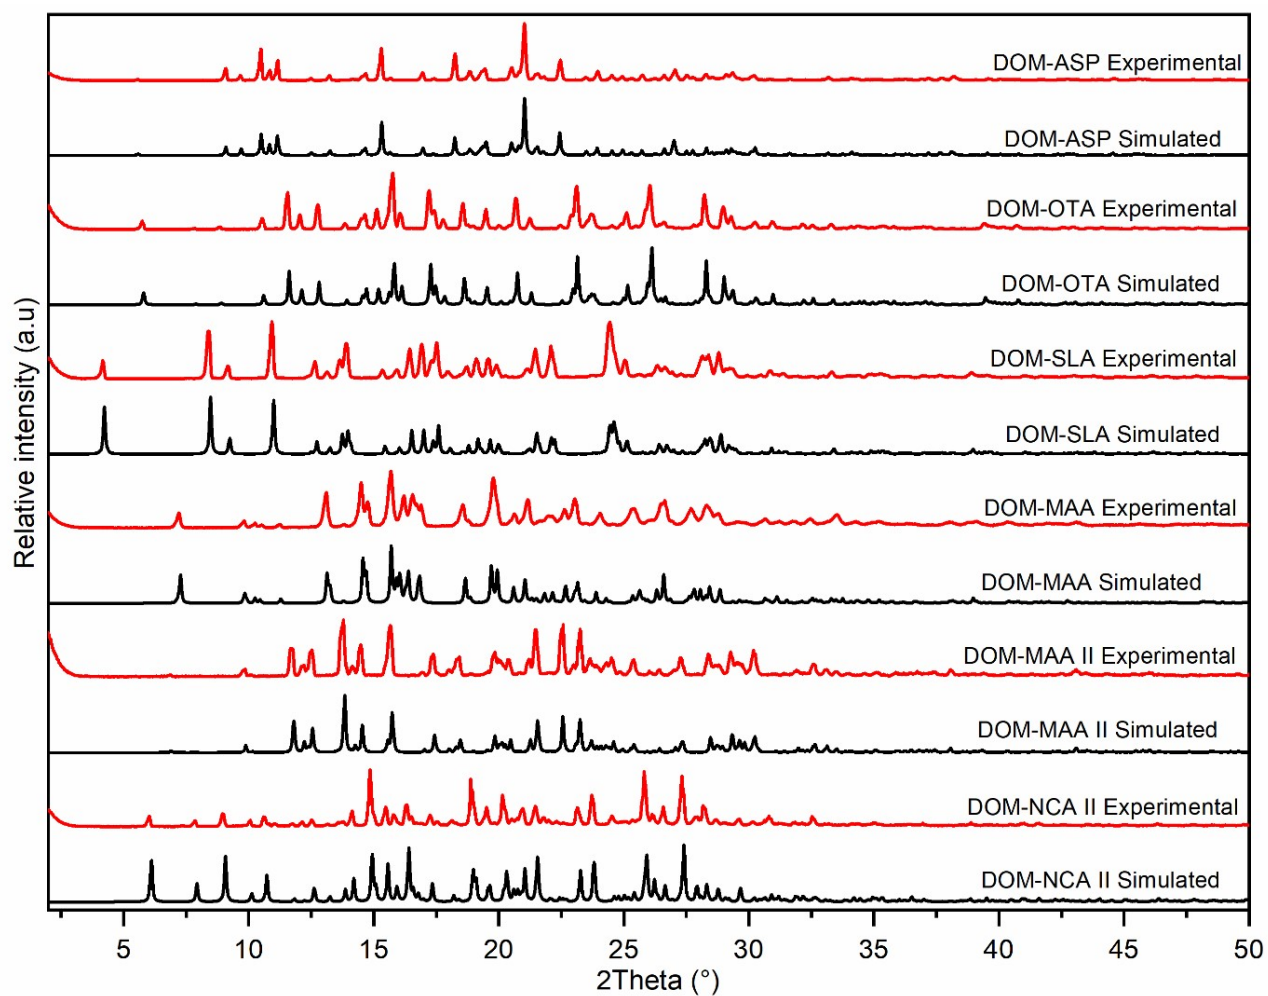

**Figure S13:** Comparison of PXRD of simulated and experimental patterns.

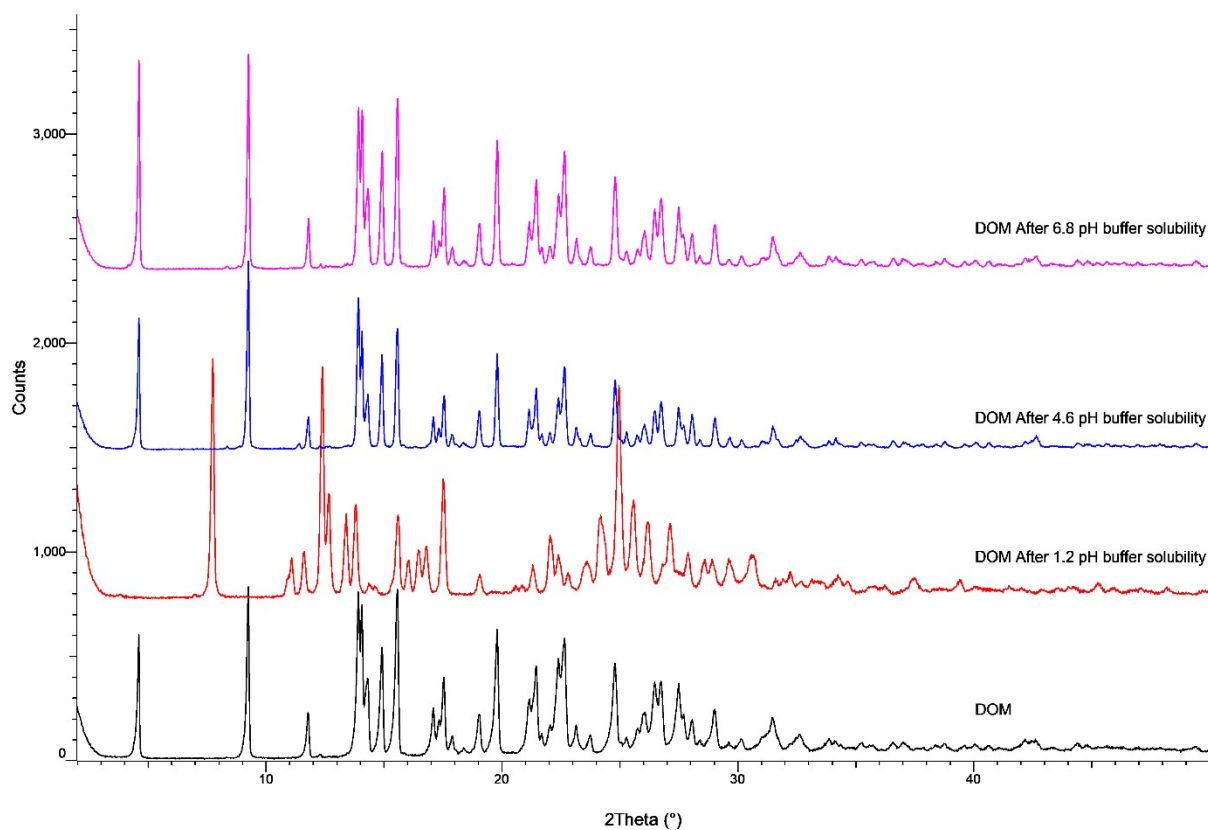

**Figure S14:** PXR overlay of DOM after equilibrium solubility study.

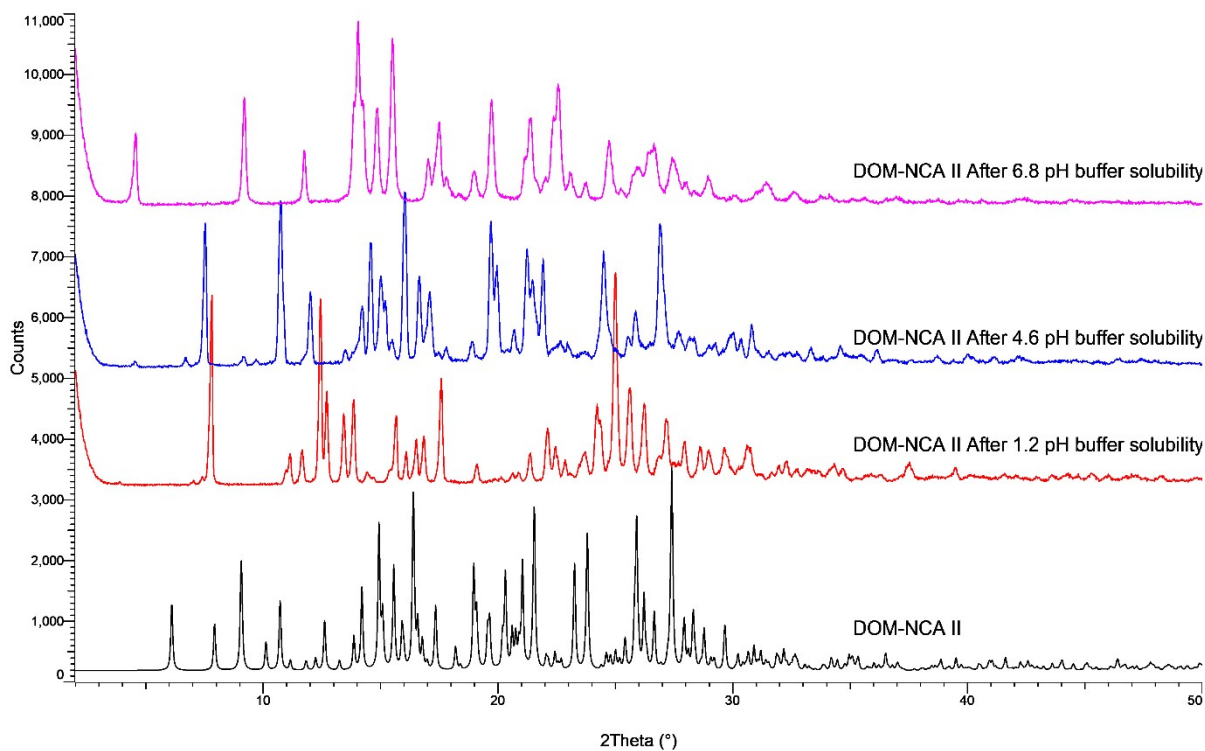

**Figure S15:** PXR overlay of DOM-NCA II salt after equilibrium solubility study.

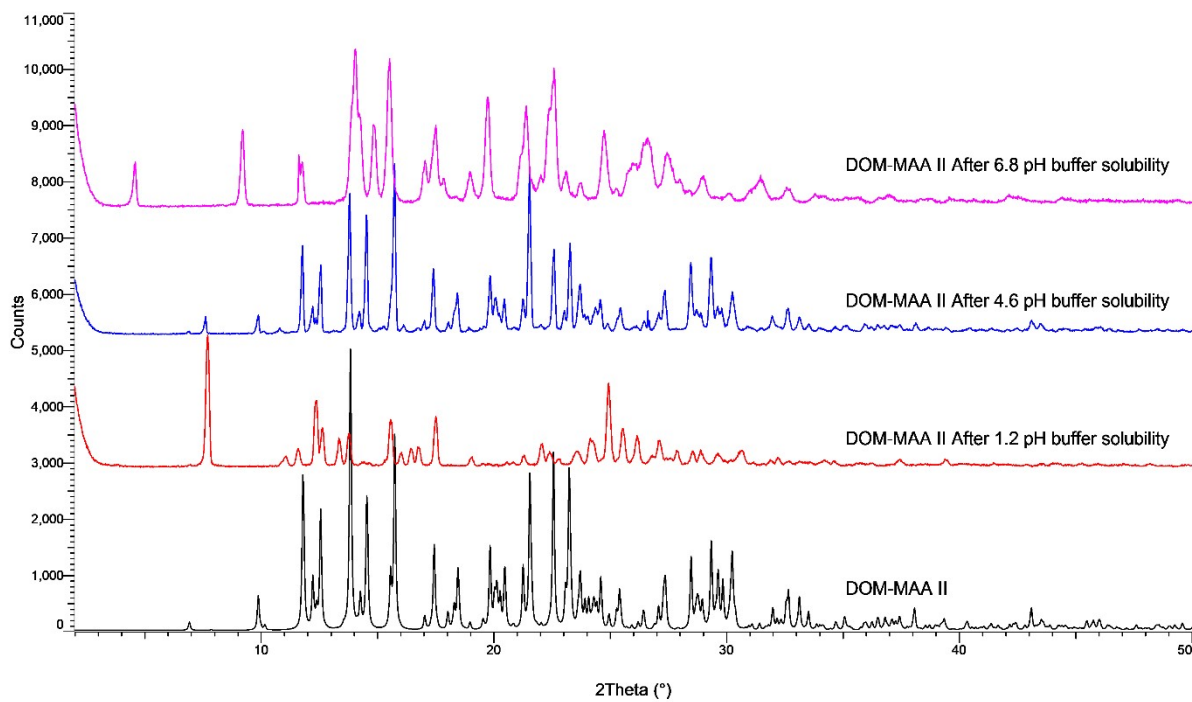

**Figure S16:** PXR overlay of DOM-MAA II salt after equilibrium solubility study.

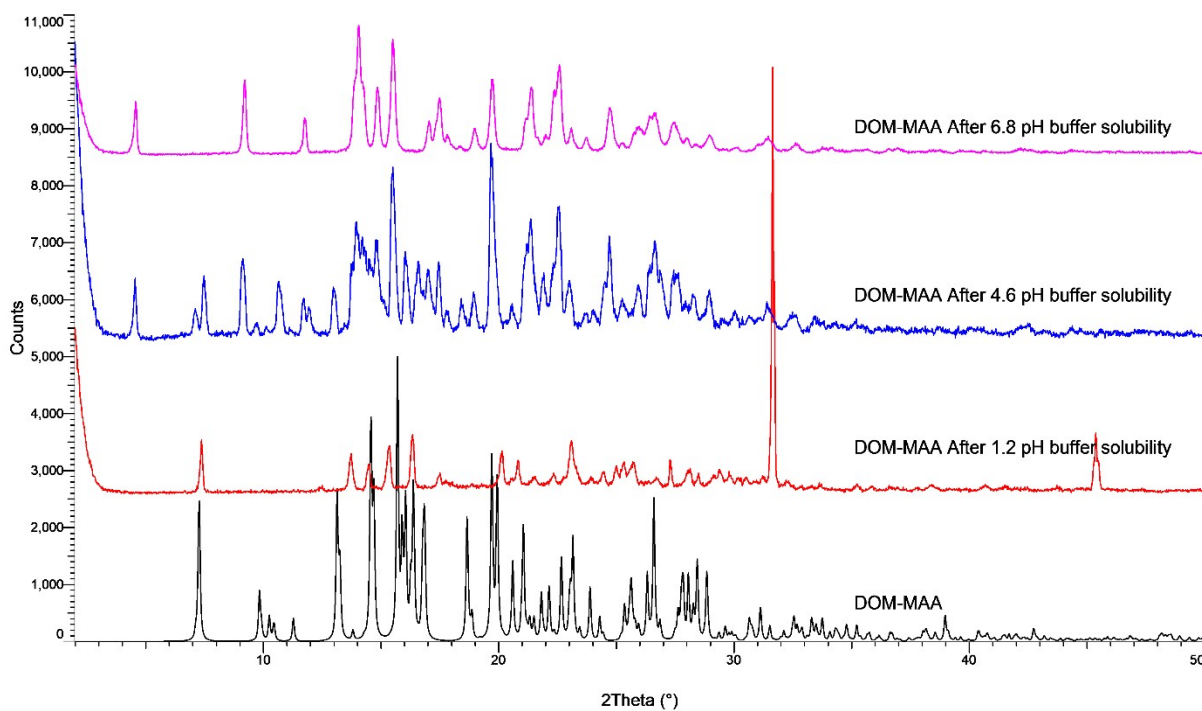

**Figure S17:** PXR overlay of DOM-MAA salt after equilibrium solubility study.



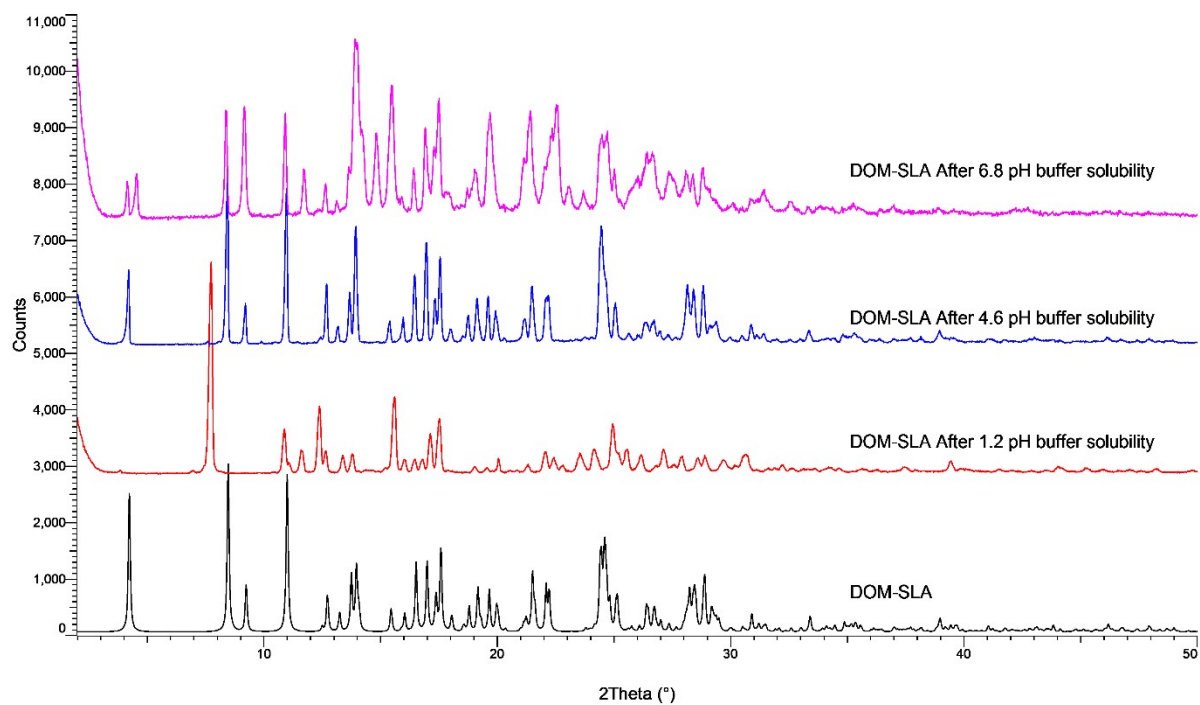

**Figure S18:** PXR overlay of DOM-SLA salt after equilibrium solubility study.

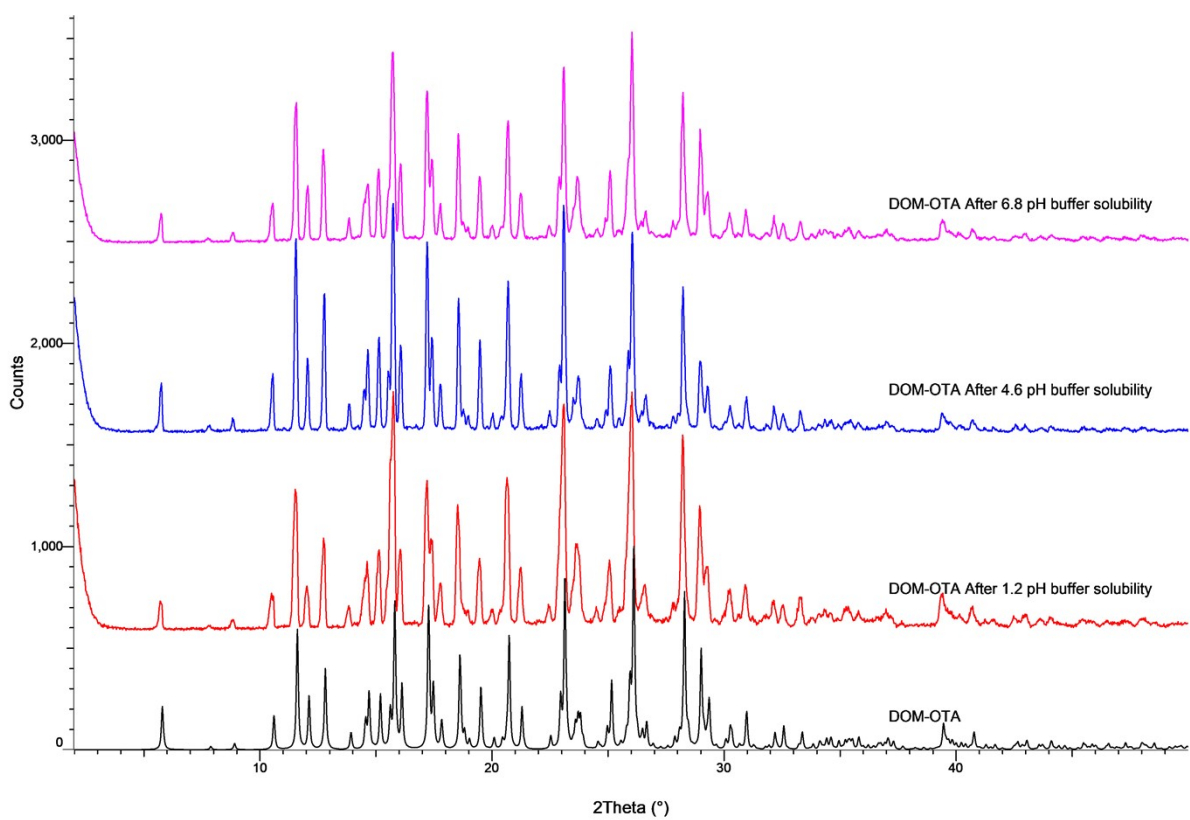

**Figure S19:** PXR overlay of DOM-OTA salt after equilibrium solubility study.

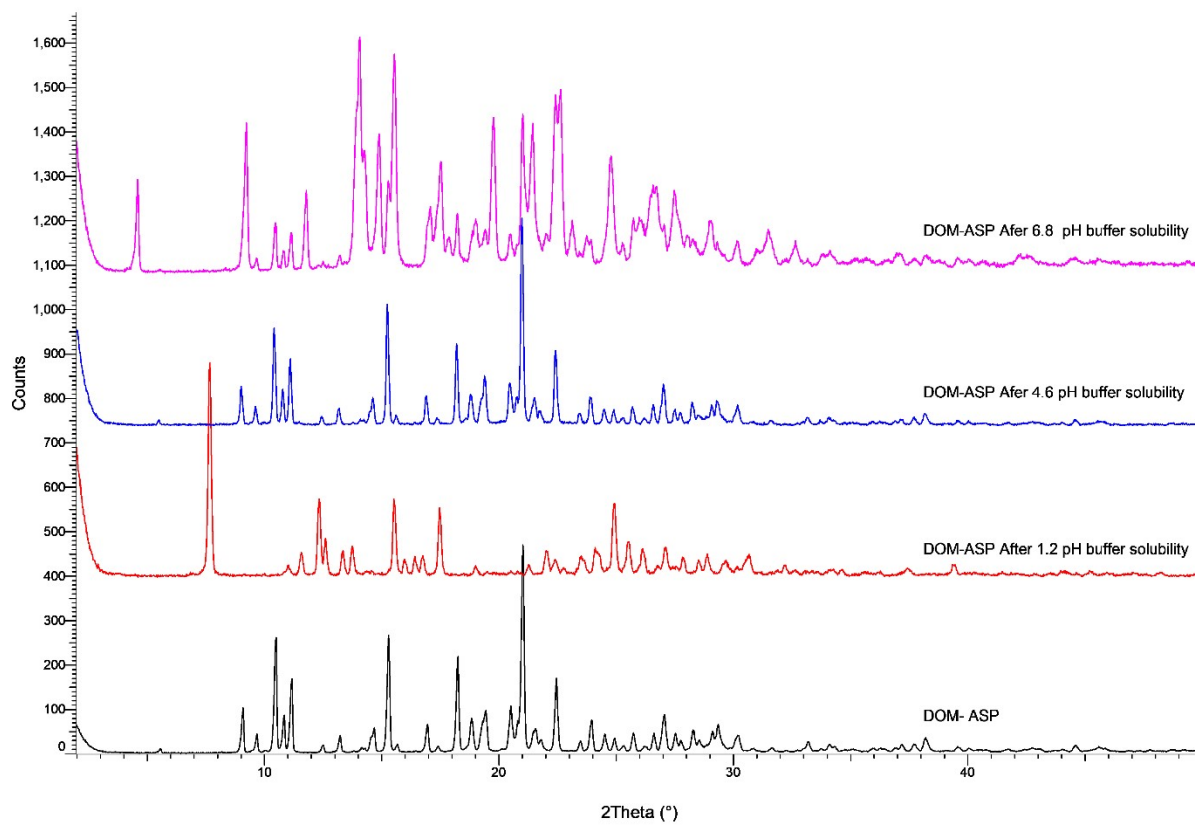

**Figure S20:** PXRD overlay of DOM-ASP salt after equilibrium solubility study.
